# Supplementary material for: Prioritizing Cardiovascular Disease-Associated Variants Altering NKX2–5 Binding through an Integrative Computational Approach
Source: PubMed Central journal article supplement — medRxiv. 2023 Sep 2:2023.09.01.23294951. Preprint. [Version 1] doi: 10.1101/2023.09.01.23294951 (PMC10491373; doi:10.1101/2023.09.01.23294951), 2023-09-02
Supplement: NIHPP2023.09.01.23294951v1-supplement-2.pdf [file NIHPP2023.09.01.23294951v1-supplement-2.pdf]

| Name | Sequence |
|------|----------|
|------|----------|

|                                             |                                                   |
|---------------------------------------------|---------------------------------------------------|
| NKX2-5 enhancer<br>chr22:25120040-25120058  | 5'- ACTTCTTGAGTGCCTGCTCGTGCCAATGCCGCCGTAAG -3'    |
| NKX2-5 enhancer<br>chr3:8596782-8596800     | 5'- CCATGCTATCATCACTCACGTGCCAATGCCGCCGTAAG -3'    |
| NKX2-5 enhancer<br>chr7:101950814-101950832 | 5'- AGTGCTGGGATTACAGGCCGTGCCAATGCCGCCGTAAG -3'    |
| TBX5 enhancer<br>chr2:30359836-30359854     | 5'- TGGTGCTGACAGCTGGGACGTGCCAATGCCGCCGTAAG -3'    |
| TBX5 enhancer<br>chr1:57623182-57623200     | 5'- GCCGGCAGAGCTGACAGGCGTGCCAATGCCGCCGTAAG -3'    |
| TBX5 enhancer<br>chr4:119047319-119047337   | 5'- AAGTGCTGGGATTACAGGCGTGCCAATGCCGCCGTAAG -3'    |
| rs6715570-ref                               | 5'- TAACACTCATGAAAATGTCTCGTGCCAATGCCGCCGTAAG -3'  |
| rs6715570-alt                               | 5'- TAACACTCAAGAAAATGTCTCGTGCCAATGCCGCCGTAAG -3'  |
| rs61872084-ref                              | 5'- AATTCAACACTTTTCATTAAACGTGCCAATGCCGCCGTAAG -3' |
| rs61872084-alt                              | 5'- AATTCAACATTTTCATTAAACGTGCCAATGCCGCCGTAAG -3'  |
| rs59310144-ref                              | 5'- AGAAGTCAAGTAATCTGTCACGTGCCAATGCCGCCGTAAG -3'  |
| rs59310144-alt                              | 5'- AGAAGTCAAATAATCTGTCACGTGCCAATGCCGCCGTAAG -3'  |
| IR 700 Primer                               | 5'- /5IRD700/CTTACGGCGGCATTGGCACG -3'             |
| TBX5 Cloning pEU Forward                    | 5'- CTGTATTTTCAGGGCATGGCCGACGCAGAC -3'            |
| TBX5 Cloning pEU Reverse                    | 5'- CGTAAATTCTATACAACTACAAGCTATTGTCGC -3'         |

### Supplementary Material

**Table 1:** Oligonucleotides used in this work.

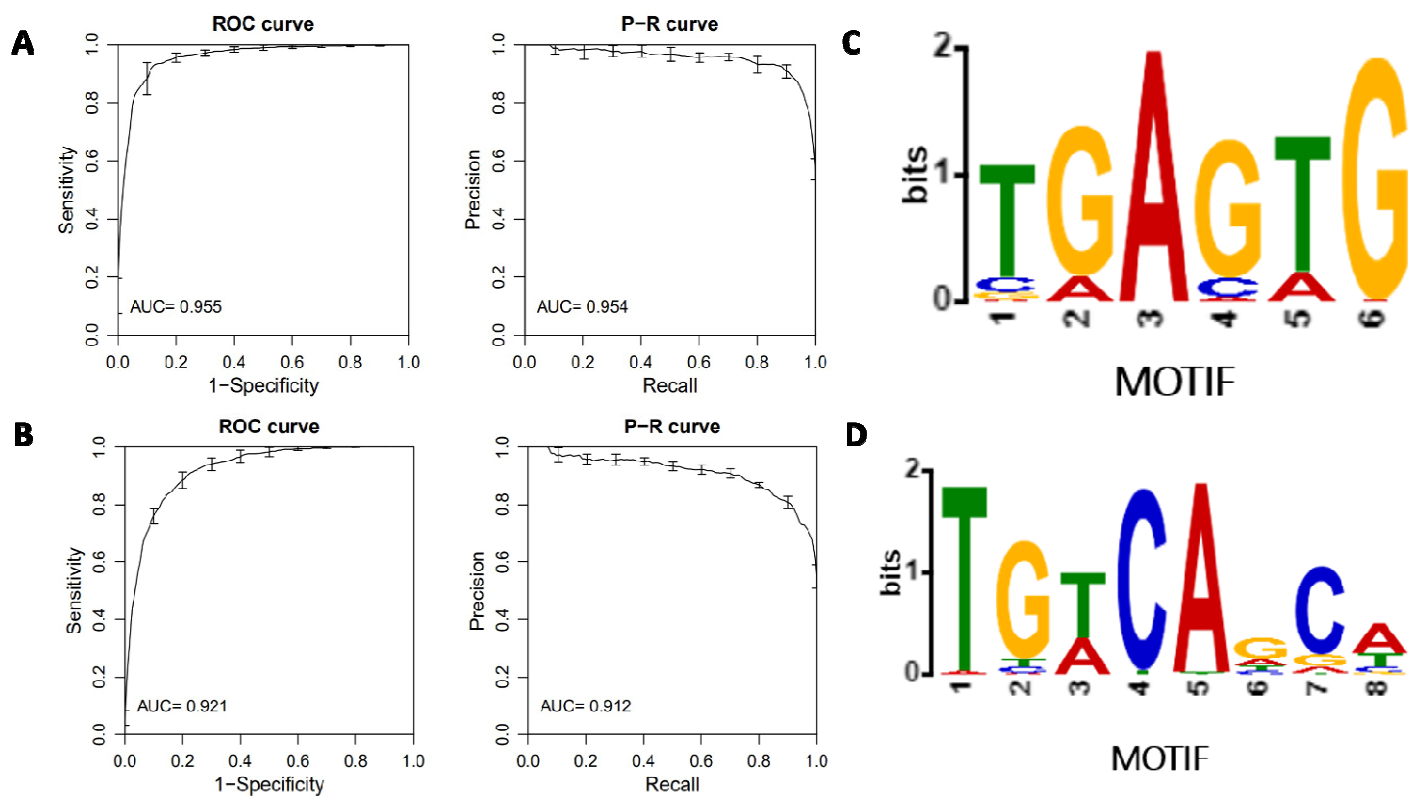

**Supplementary Figure 1:** Performance parameters and motif analysis. Performance parameters of **A**) NKX2-5 and **B**) TBX5 as determined by their receiver operating characteristics (ROC) and precision-recall curves. Binding motif for **C**) NKX2-5 and **D**) TBX5 after scoring all possible 11-mers and generating a PWM logo.

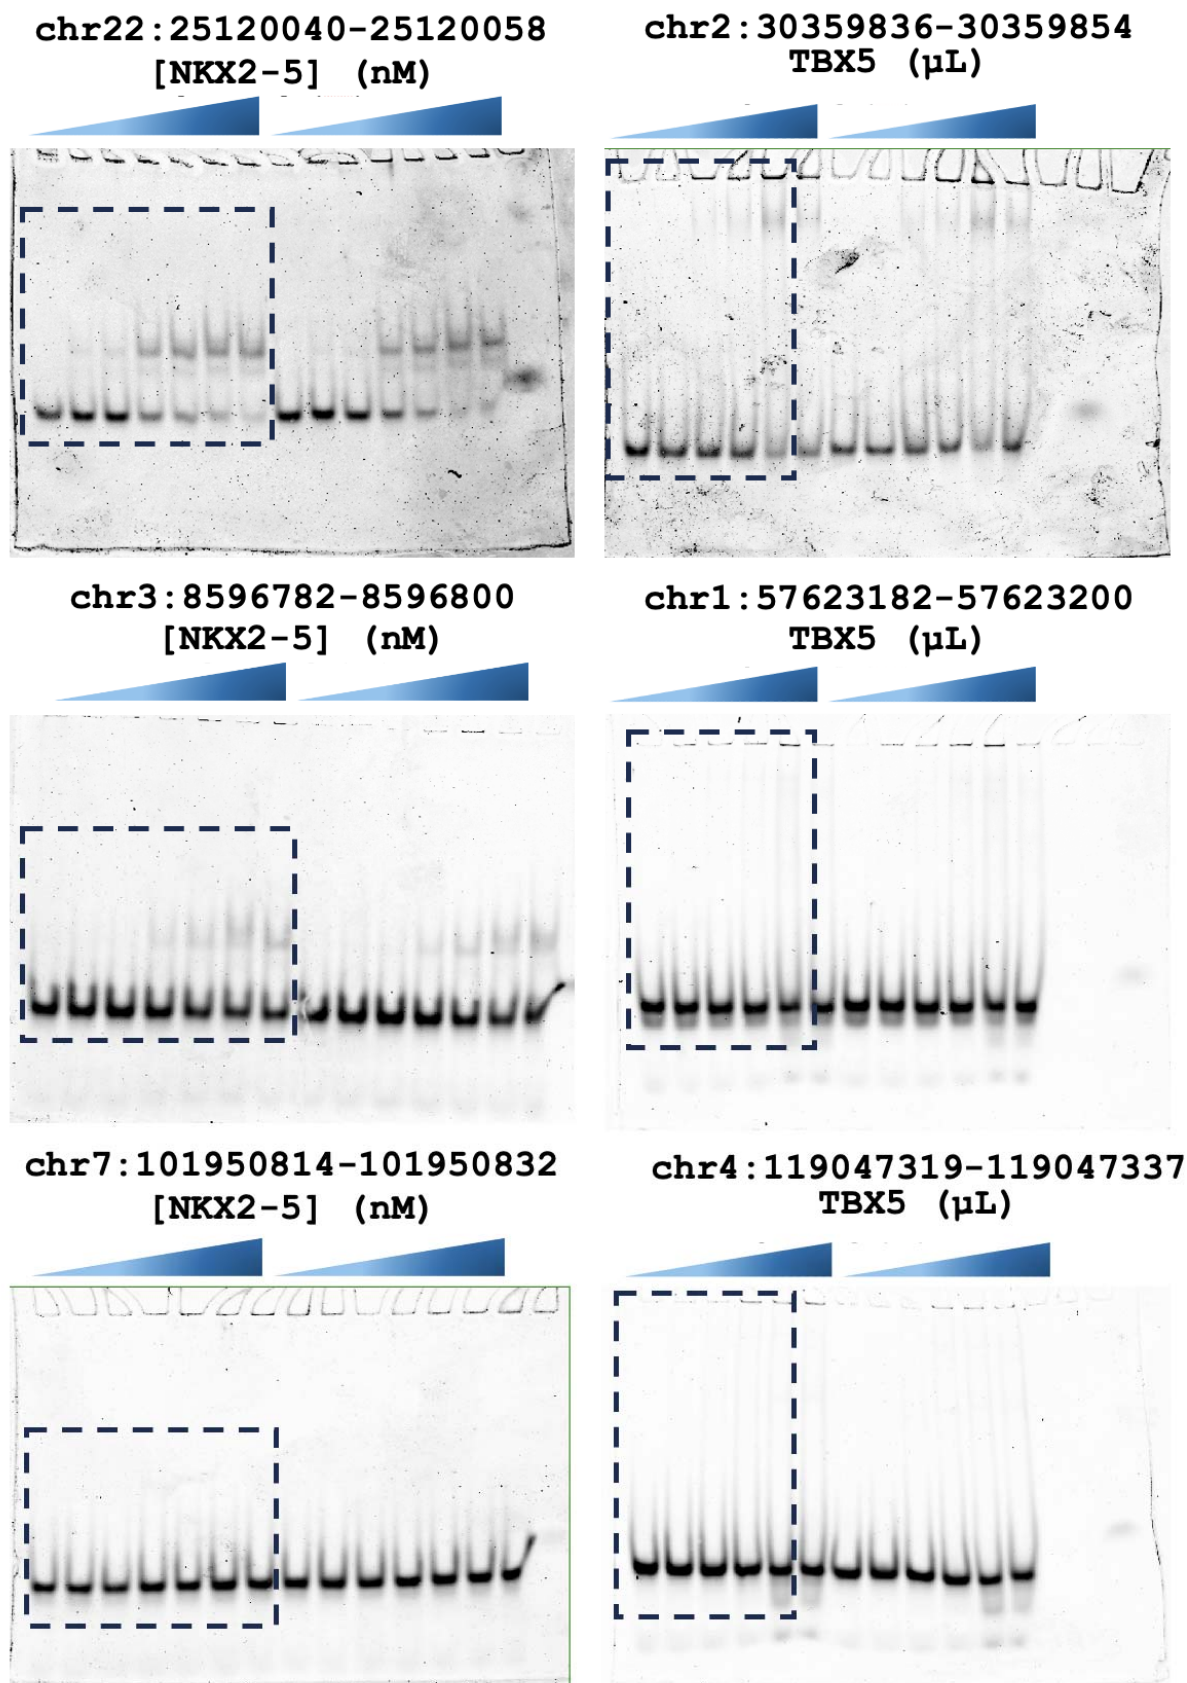

**Supplementary Figure 2:** EMSA analysis of heart footprint and enhancers for NKX2-5 (left) and TBX5 (right). All EMSA were performed and triplicates and regions within dashed were used to generate binding curves.

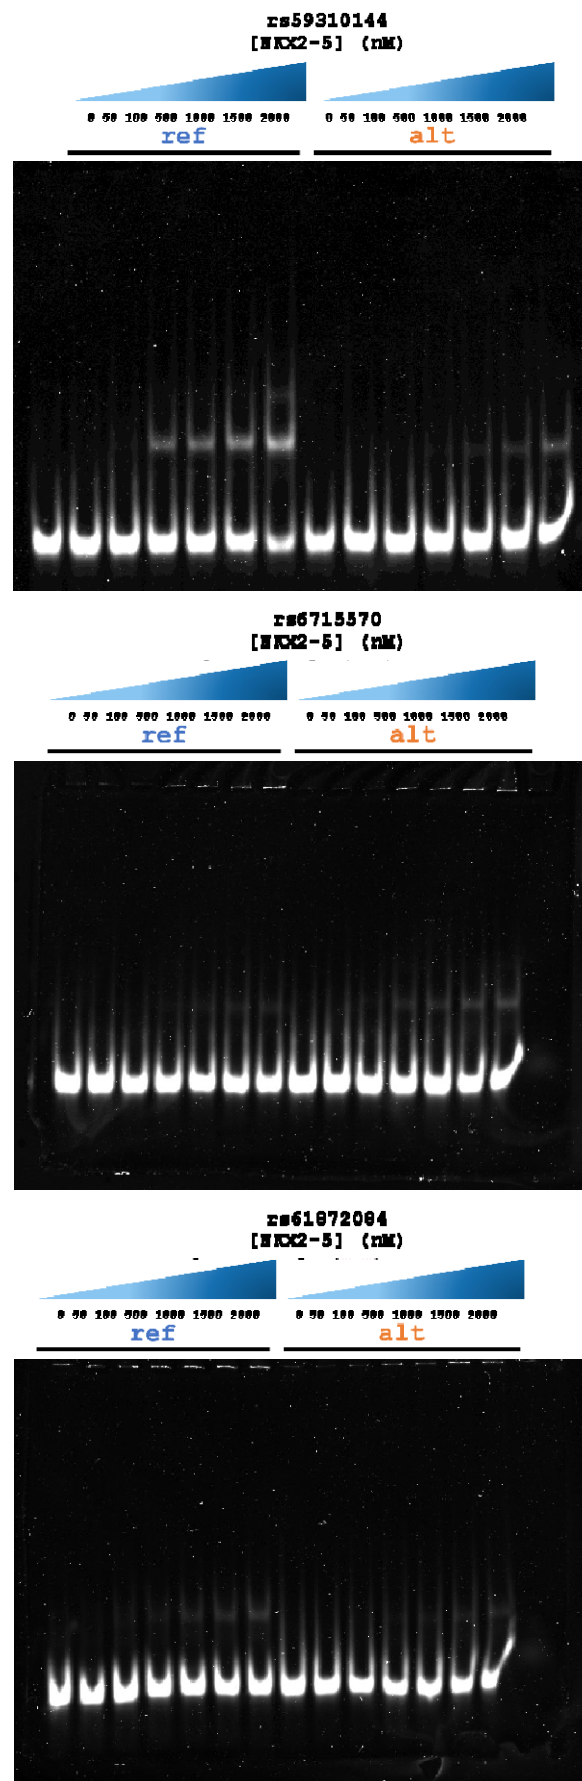

**Supplementary Figure 3: EMSA analysis of three CVD-associated SNPs.**

**Supplementary Table 2:** CVD-associated SNPs with differential gene expression in cardiac tissue and predicted impact on NKX2-5 DNA binding.

| Query SNP | LD SNP     | Chr | Position  | Ref score    | Alt score   | deltaSVM Score | Gene            | Tissue                   | P value  | Association to CVD                                                                                      |
|-----------|------------|-----|-----------|--------------|-------------|----------------|-----------------|--------------------------|----------|---------------------------------------------------------------------------------------------------------|
| s17074987 | rs59310144 | 13  | 50917644  | G<br>(0.56)  | A<br>(0.06) | -0.5           | <i>RNASEH2B</i> | Heart - Atrial Appendage | 2.33E-39 | Identified as differentially expressed in CVD risk events                                               |
| rs6435862 | rs6715570  | 2   | 214808716 | T<br>(0.217) | C<br>(0.92) | 0.7            | <i>BARD1</i>    | Heart - Atrial Appendage | 2.39E-25 | Associated with development delay and coarctation of aorta in early organogenesis and heart development |
| s11245347 | rs61872084 | 10  | 124750493 | C<br>(0.44)  | T<br>(-0.2) | -0.63          | <i>METTL10</i>  | Heart - Left Ventricle   | 6.81E-27 | A high concentration of enzymatic product (tHcy) is correlated with kidney dysfunction and CVD          |
